# Supplementary material for: Three new compounds from the flower branch of Gastrodia elata Blume and anti-microbial activity
Source: Royal Society of Chemistry journal article supplement (doi:10.1039/d0ra00965b), 2020-01-01
Supplement: d0ra00965b1.pdf [file d0ra00965b1.pdf]

## Supporting information

### Three new compounds from the flower branch of *Gastrodia elata*

#### Blume and anti-microbial activity

Liu Yang,<sup>†a</sup> Rong Jiang,<sup>†c</sup> Hui-Hui Li,<sup>†b</sup> Ya-Ping Pan<sup>c</sup>, Jing-Jin Lu<sup>c</sup>, Hong Zhang<sup>b</sup>,

Shou-Jin Liu<sup>\*b</sup>, Ji-Lu Shen<sup>\*d</sup>, Jiang-Miao Hu<sup>\*a</sup>

<sup>a</sup> State Key Laboratory of Phytochemistry and Plant Resources in West China, Kunming Institute of Botany, Chinese Academy of Sciences, Kunming 650204, Yunnan, China

<sup>b</sup> College of Pharmacy, Anhui University of Traditional Chinese Medicine, Hefei 230038, China

<sup>c</sup> Department of Pharmacy, First Affiliated Hospital of Anhui Medical University, Anhui Medical University, Hefei, 230022, Anhui, China.

<sup>d</sup> Department of Laboratory Medicine, Forth Affiliated Hospital of Anhui Medical University, Anhui Medical University, Hefei, 230022, Anhui, China.

**Abstract:** Three new compounds (**1–3**), including novel tetra-*p*-cresol substituted cyclopenta[*a*]naphthalene derivatives, named gastrodinol (**1**), 2-(4'-hydroxybenzoyl)-3-hydroxyethyl indole (**2**), 2-(4'-hydroxybenzoyl)-3-(4''-hydroxybenzyl)indole (**3**) were isolated from the flower branch of *G. elata*, along with five known compounds (**4–8**). Among them, compound **1** exhibited the most anti-microbial activity against *Streptococcus agalactiae*, with the minimum inhibitory concentration of 1 µg·ml<sup>-1</sup>. This study demonstrated that the novel compound **1** found in the flower branch of *G. elata* may be responsible for anti-microbial effect. It will lead to the development of new antibiotics, and how to utilize the TCM ("Tianma") better.

**Keywords:** *Gastrodia elata*; phenolic compounds; anti-microbial activity

## Qualitative Analysis Report

|                        |              |               |                       |
|------------------------|--------------|---------------|-----------------------|
| Data Filename          | zhh-2-.d     | Sample Name   | zhh-2                 |
| Sample Type            | Sample       | Position      | P1-A1                 |
| Instrument Name        | Instrument 1 | User Name     |                       |
| Acq Method             | s-.m         | Acquired Time | 6/20/2019 10:09:17 AM |
| IRM Calibration Status | Success      | DA Method     | Default.m             |
| Comment                |              |               |                       |

Sample Group Info.  
 Acquisition SW 6200 series TOF/6500 series  
 Version Q-TOF B.05.01 (B5125.2)

### User Spectra

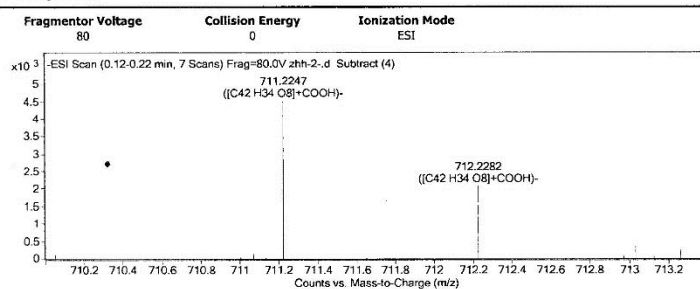

#### Peak List

| m/z      | z | Abund    |
|----------|---|----------|
| 89.0244  |   | 15483.73 |
| 339.2342 | 1 | 99244.21 |
| 340.2376 | 1 | 25692    |
| 347.1728 | 1 | 18513.32 |
| 365.2476 | 1 | 19452.87 |
| 375.2767 | 1 | 46418.15 |
| 393.2792 | 1 | 15546.55 |
| 403.3082 | 1 | 38207.61 |
| 453.2274 | 1 | 21337.53 |
| 713.476  | 1 | 18583.38 |

#### Formula Calculator Element Limits

| Element | Min | Max |
|---------|-----|-----|
| C       | 3   | 60  |
| H       | 0   | 120 |
| O       | 0   | 30  |

#### Formula Calculator Results

| Formula    | CalculatedMass | CalculatedMz | Mz       | Diff. (mDa) | Diff. (ppm) | DBE     |
|------------|----------------|--------------|----------|-------------|-------------|---------|
| C42 H34 O8 | 666.2254       | 711.2236     | 711.2247 | -1.10       | -1.55       | 26.0000 |

--- End Of Report ---

**Figure S1. HRESIMS of compound 1.**

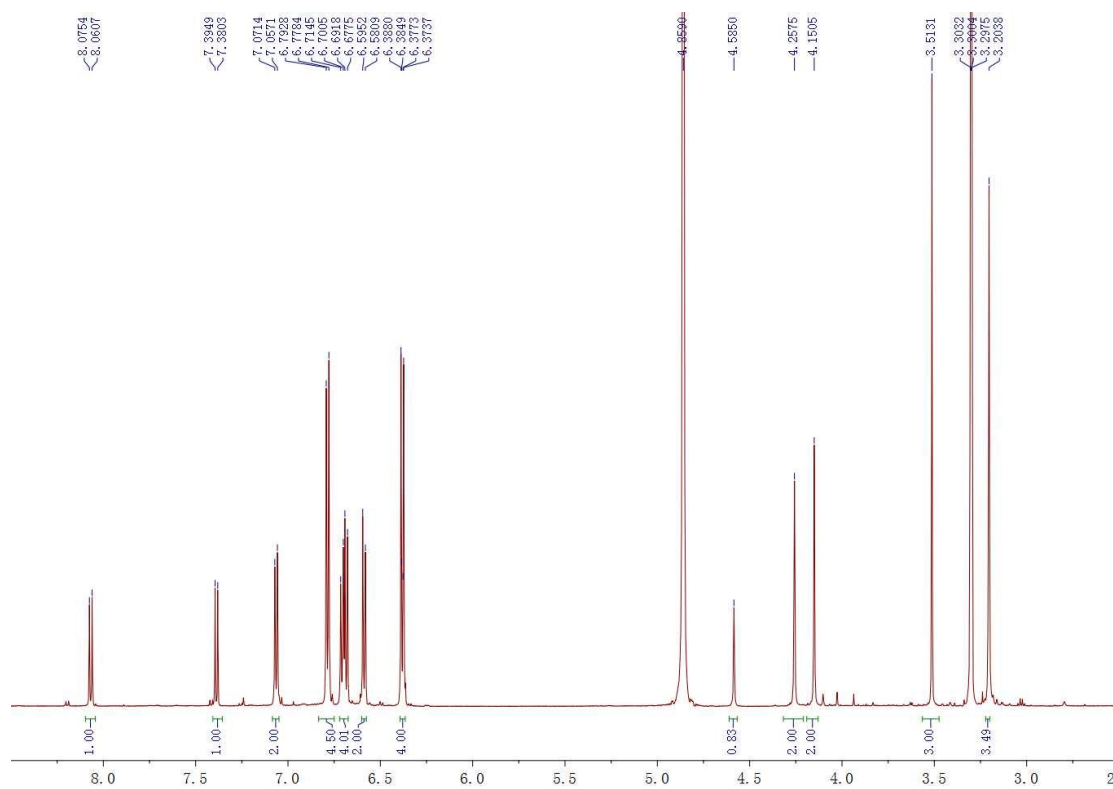

Figure S2.  $^1\text{H-NMR}$  of compound **1**.

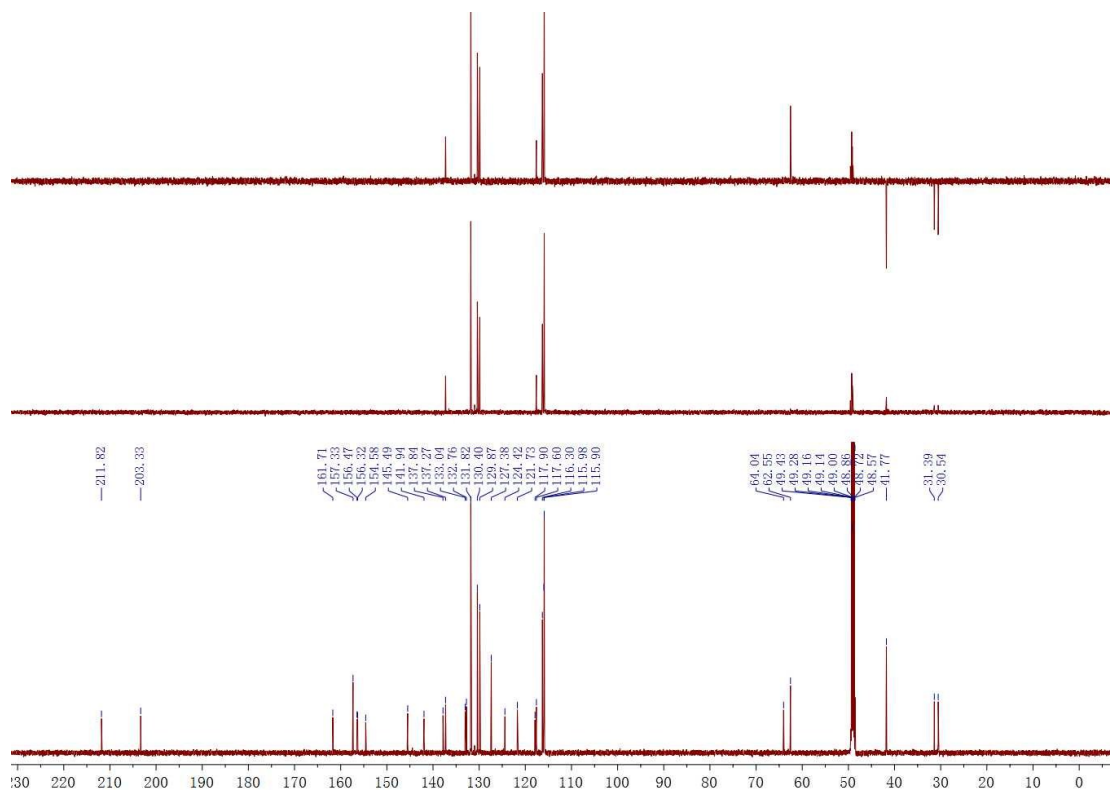

**Figure S3.**  $^{13}\text{C}$ -NMR of compound 1.

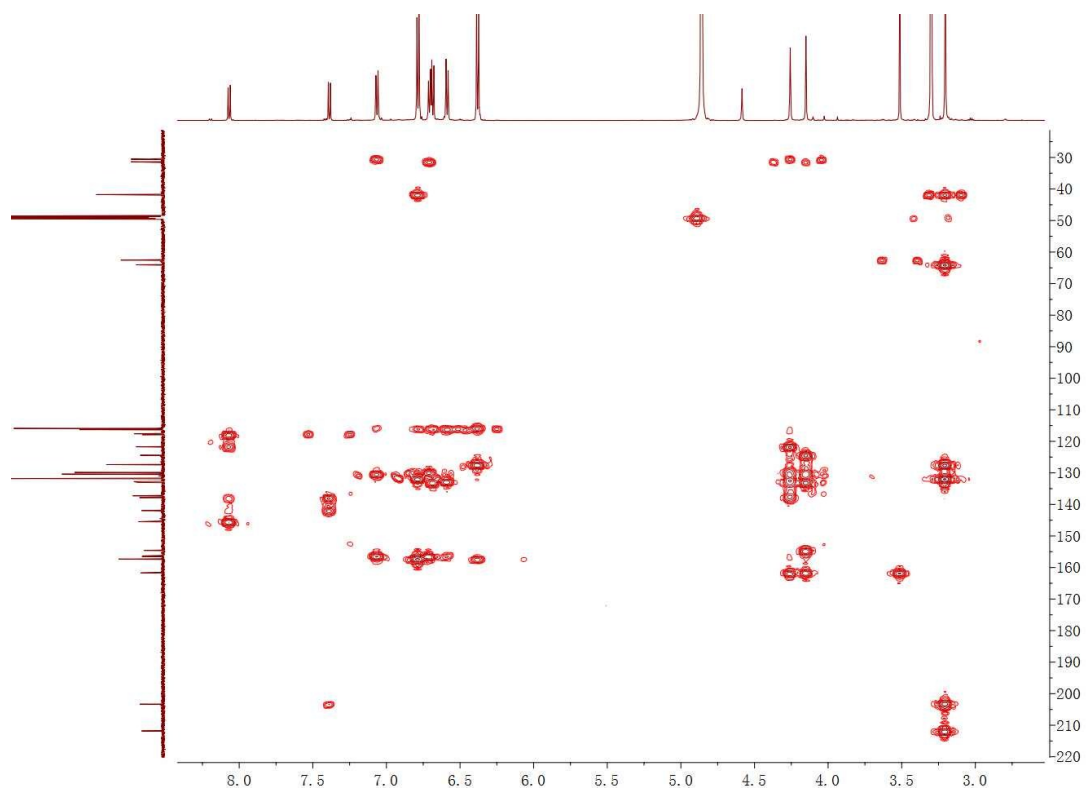

**Figure S4.** HMBC of compound **1**.

## Qualitative Analysis Report

|                               |                      |                      |                       |
|-------------------------------|----------------------|----------------------|-----------------------|
| <b>Data Filename</b>          | 150130ESIA1.d        | <b>Sample Name</b>   | zhh-1                 |
| <b>Sample Type</b>            | Sample               | <b>Position</b>      |                       |
| <b>Instrument Name</b>        | Agilent G6230 TOF MS | <b>User Name</b>     | KIB                   |
| <b>Acq Method</b>             | ESI.m                | <b>Acquired Time</b> | 1/30/2015 12:27:32 PM |
| <b>IRM Calibration Status</b> | Success              | <b>DA Method</b>     | ESI.m                 |

**Comment**

**Sample Group** Info.

**Acquisition SW** 6200 series TOF/6500 series

**Version** Q-TOF B.05.01 (B5125.2)

### User Spectra

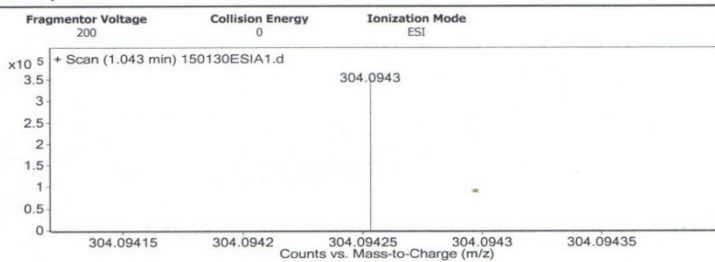

| <i>m/z</i> | z | Abund     | Formula         | Ion |
|------------|---|-----------|-----------------|-----|
| 121.0338   |   | 21475.58  |                 |     |
| 299.1095   | 1 | 51949.55  |                 |     |
| 301.1397   |   | 21687.71  |                 |     |
| 304.0943   | 1 | 351650.47 | C17 H15 N Na O3 | M+  |
| 305.0975   | 1 | 59522.75  | C17 H15 N Na O3 | M+  |
| 345.1204   | 1 | 80263.8   |                 |     |
| 413.2669   | 1 | 27380.66  |                 |     |
| 585.1992   | 1 | 112360.64 |                 |     |
| 586.2019   | 1 | 38124.55  |                 |     |
| 694.3715   | 1 | 26222.6   |                 |     |

#### Formula Calculator Element Limits

| Element | Min | Max |
|---------|-----|-----|
| C       | 0   | 200 |
| H       | 0   | 400 |
| O       | 0   | 8   |
| Na      | 1   | 1   |
| N       | 1   | 1   |

#### Formula Calculator Results

| Formula         | CalculatedMass | CalculatedMz | Mz       | Diff. (mDa) | Diff. (ppm) | DBE     |
|-----------------|----------------|--------------|----------|-------------|-------------|---------|
| C17 H15 N Na O3 | 304.0950       | 304.0944     | 304.0943 | 0.2         | 0.6         | 10.5000 |

--- End Of Report ---

**Figure S5. HRESIMS of compound 2.**

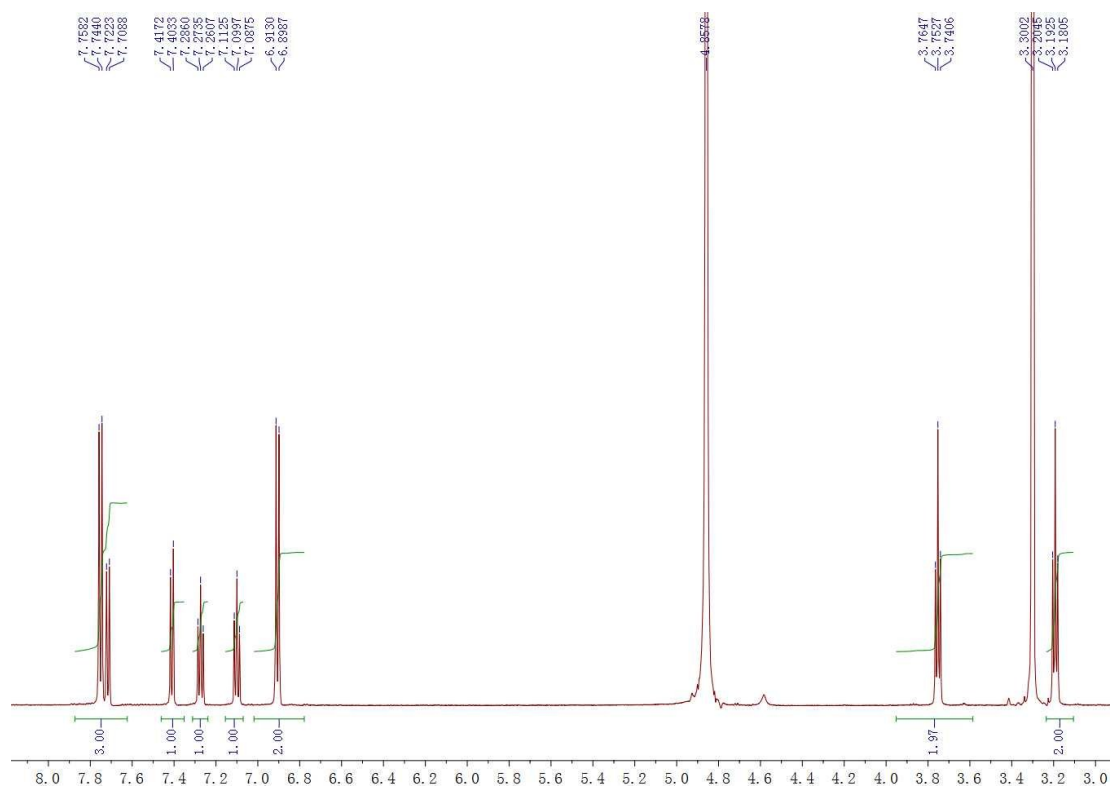

Figure S6.  $^1\text{H-NMR}$  of compound **2**.

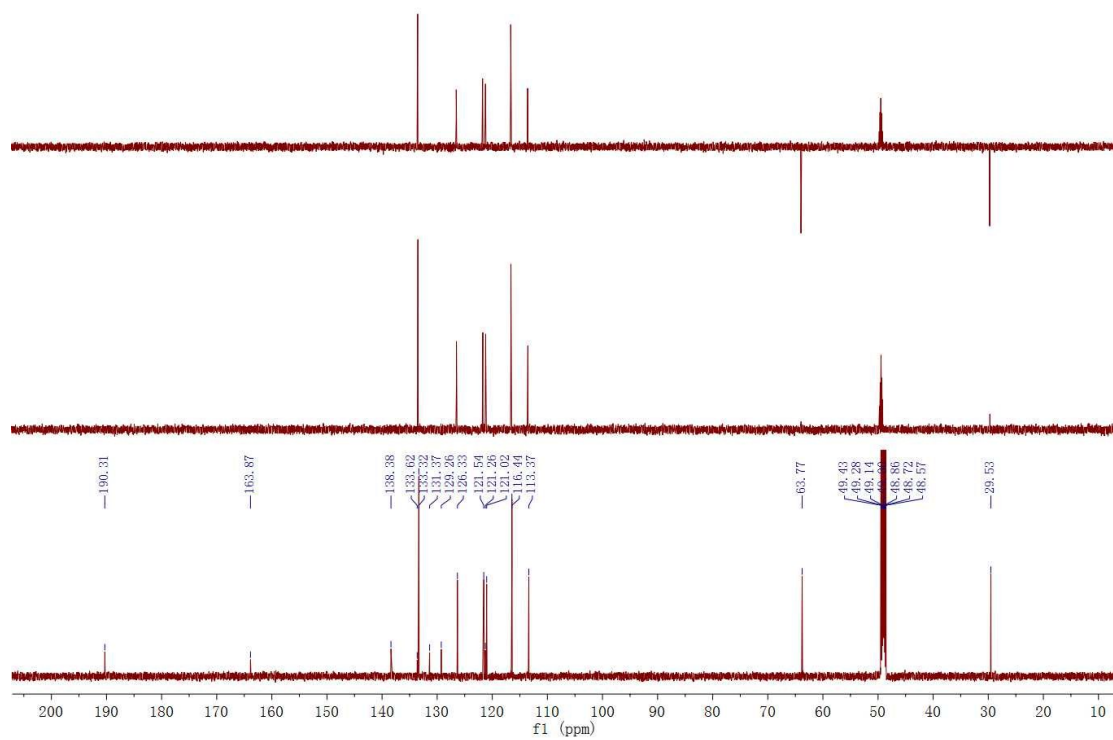

**Figure S7.** <sup>13</sup>C-NMR of compound 2.



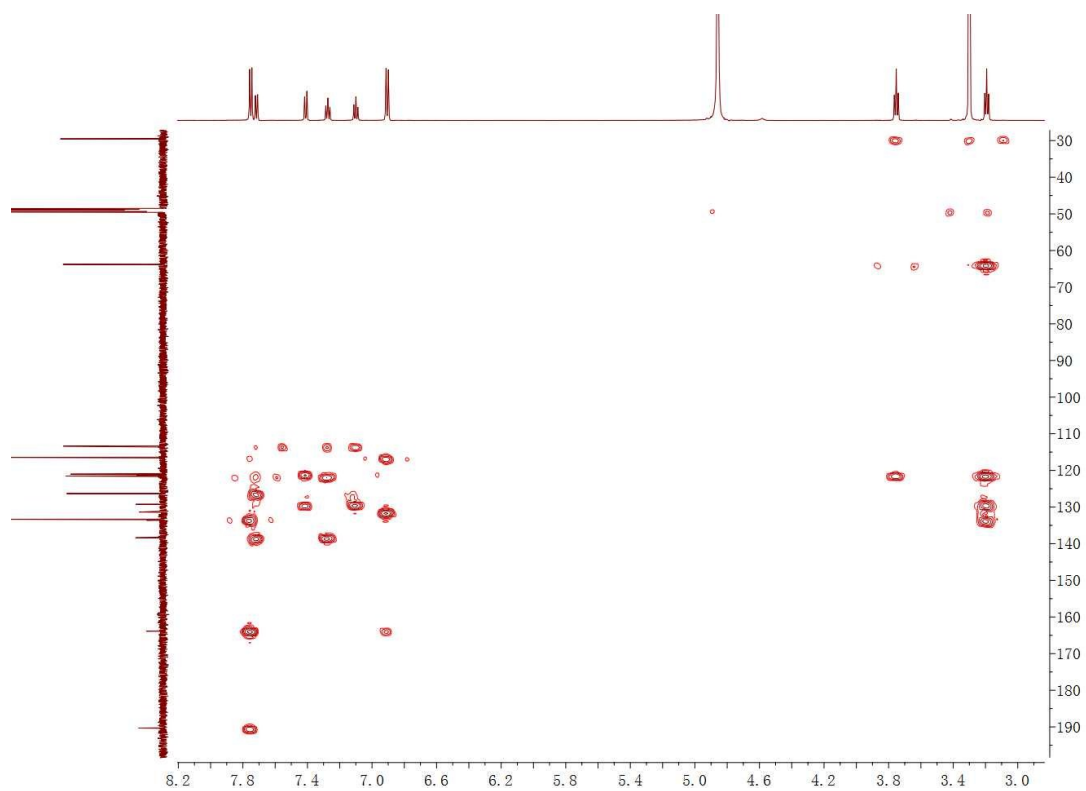

**Figure S8.** HMBC of compound **2**.

## Qualitative Analysis Report

|                        |                      |               |                       |
|------------------------|----------------------|---------------|-----------------------|
| Data Filename          | 150130ESIA2.d        | Sample Name   | zhh-17                |
| Sample Type            | Sample               | Position      |                       |
| Instrument Name        | Agilent G6230 TOF MS | User Name     | KIB                   |
| Acq Method             | ESI.m                | Acquired Time | 1/30/2015 12:29:27 PM |
| IRM Calibration Status | Success              | DA Method     | ESI.m                 |
| Comment                |                      |               |                       |

|                |                             |
|----------------|-----------------------------|
| Sample Group   | Info.                       |
| Acquisition SW | 6200 series TOF/6500 series |
| Version        | Q-TOF B.05.01 (B5125.2)     |

### User Spectra

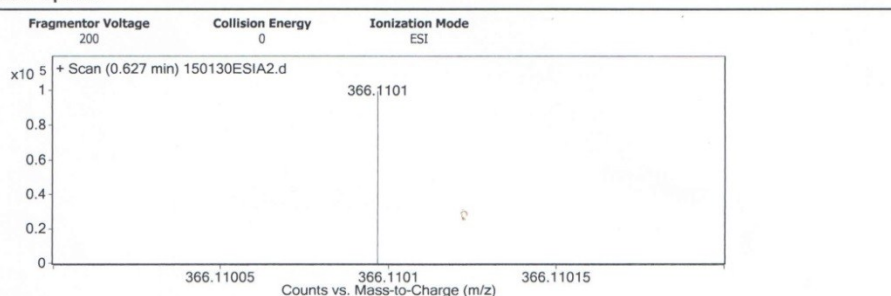

### Peak List

| m/z      | z | Abund    | Formula         | Ion |
|----------|---|----------|-----------------|-----|
| 121.0509 | 1 | 40675.41 |                 |     |
| 250.0861 | 1 | 17193.38 |                 |     |
| 360.3234 | 1 | 24369.18 |                 |     |
| 363.1021 | 2 | 16409.66 |                 |     |
| 366.1101 | 1 | 99525.78 | C22 H17 N Na O3 | M+  |
| 367.1132 | 1 | 20320.97 | C22 H17 N Na O3 | M+  |
| 382.0837 | 1 | 30991.05 |                 |     |
| 709.23   | 1 | 53005.6  |                 |     |
| 710.2331 | 1 | 24449.06 |                 |     |
| 922.0098 | 1 | 74399.55 |                 |     |

### Formula Calculator Element Limits

| Element | Min | Max |
|---------|-----|-----|
| C       | 0   | 200 |
| H       | 0   | 400 |
| O       | 0   | 8   |
| Na      | 1   | 1   |
| N       | 1   | 1   |

### Formula Calculator Results

| Formula         | CalculatedMass | CalculatedMz | Mz       | Diff. (mDa) | Diff. (ppm) | DBE     |
|-----------------|----------------|--------------|----------|-------------|-------------|---------|
| C22 H17 N Na O3 | 366.1106       | 366.1101     | 366.1101 | 0.0         | 0.0         | 14.5000 |

--- End Of Report ---

**Figure S9. HRESIMS of compound 3.**

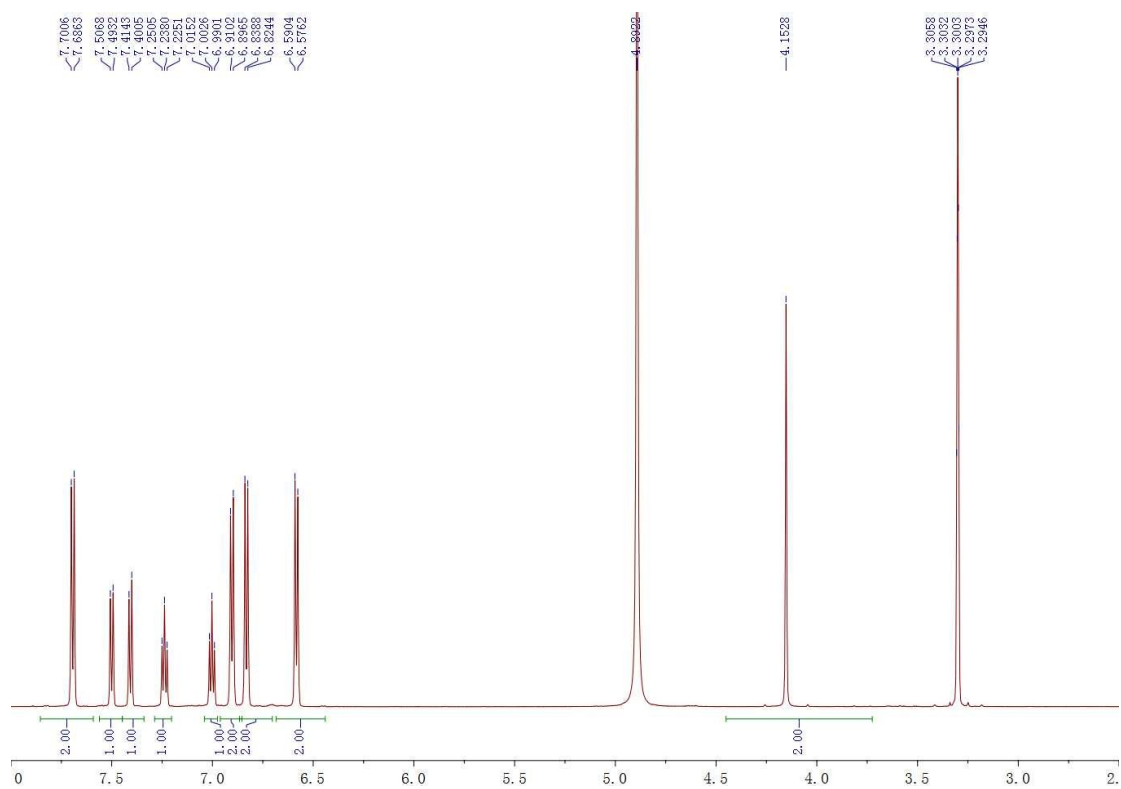

**Figure S10.** <sup>1</sup>H-NMR of compound **3**.

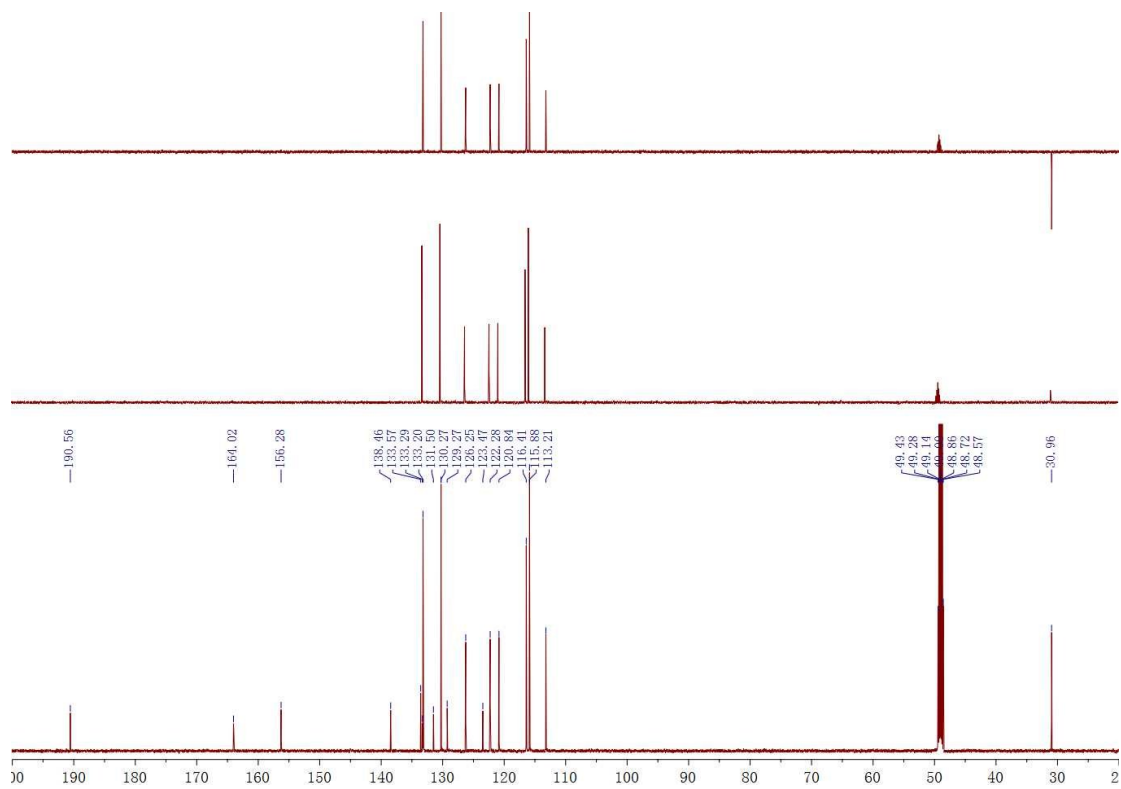

**Figure S11.**  $^{13}\text{C}$ -NMR of compound 3.

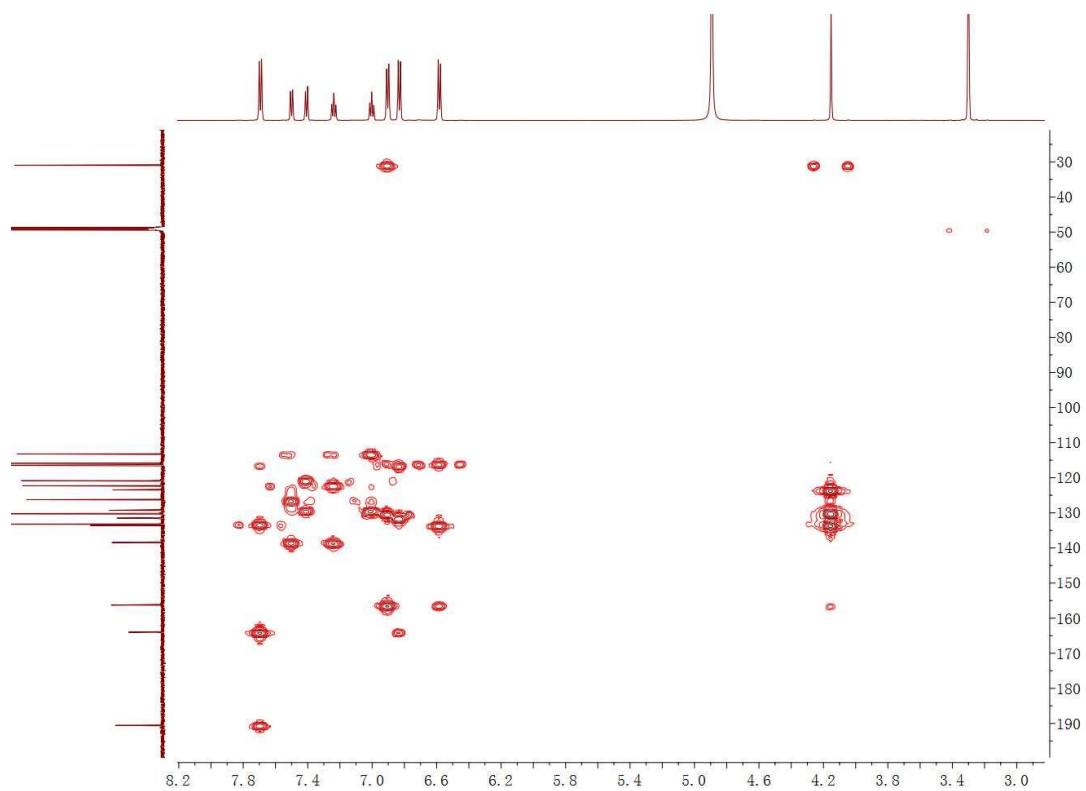

**Figure S12.** HMBC of compound **3**.
